# Supplementary material for: Chromatin accessibility maps provide evidence of multilineage gene priming in hematopoietic stem cells
Source: PubMed Central journal article supplement (PMC7789351; doi:10.1186/s13072-020-00377-1), 2021-01-06

# Supplemental Figure 1

**A HSC**

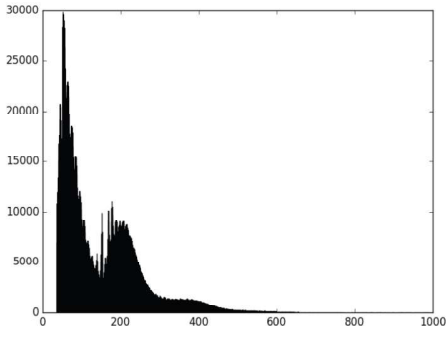

**B EP**

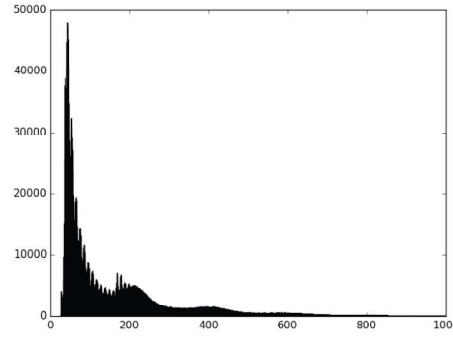

**C MkP**

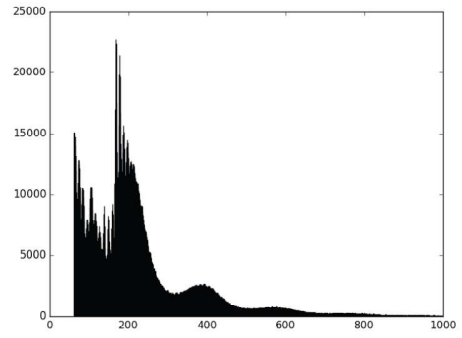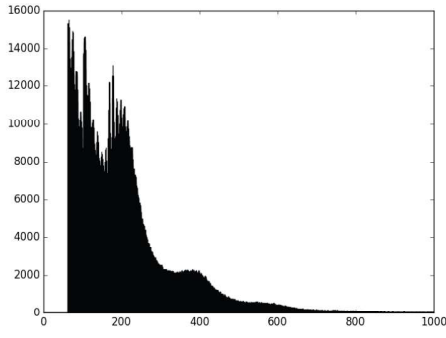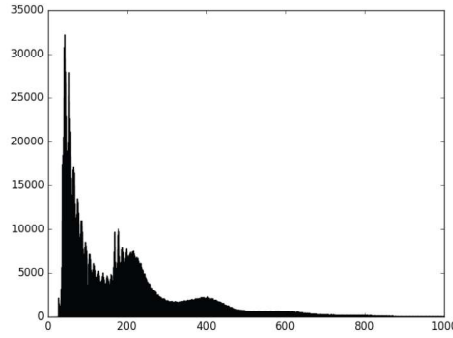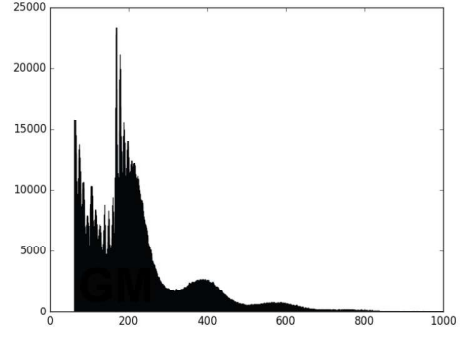

**D GM**

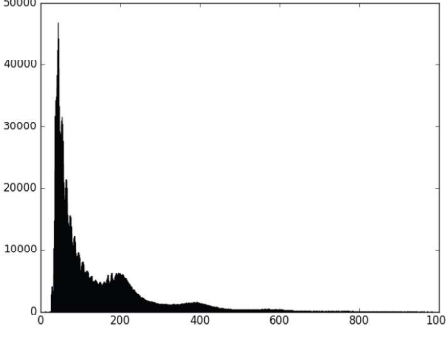

**E B cell**

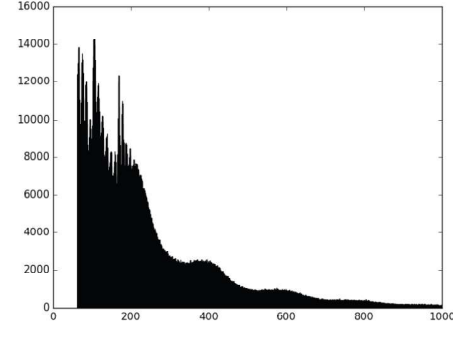

**F T cell**

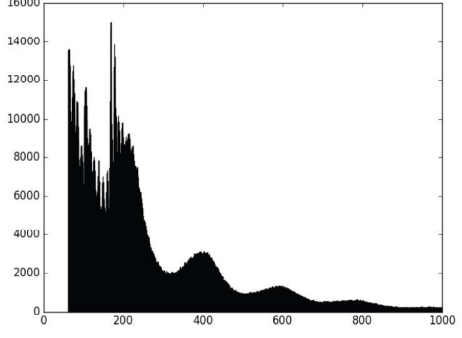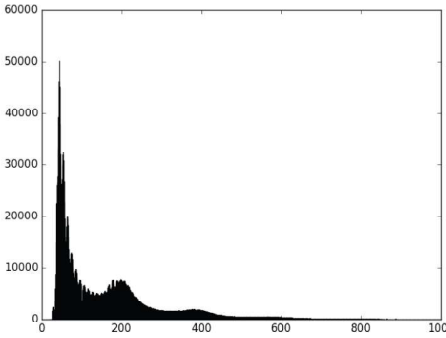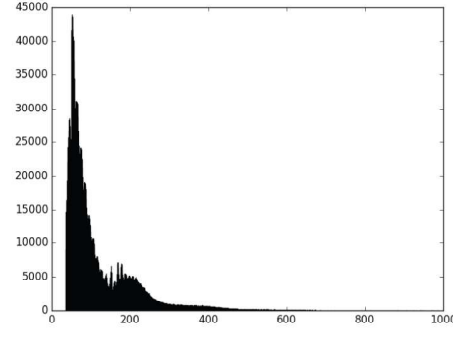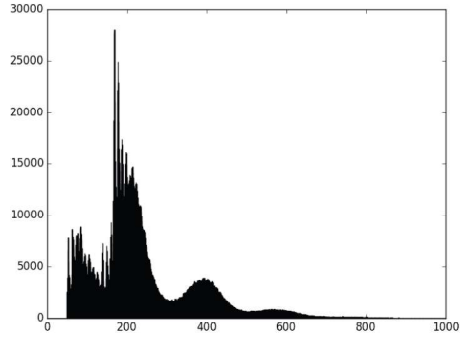

Supplement: 13072_2020_377_MOESM1_ESM.pdf [file 13072_2020_377_MOESM1_ESM.pdf]
