# Supplementary material for: Chromatin accessibility maps provide evidence of multilineage gene priming in hematopoietic stem cells
Source: PubMed Central journal article supplement (PMC7789351; doi:10.1186/s13072-020-00377-1), 2021-01-06

# Supplemental Figure 3

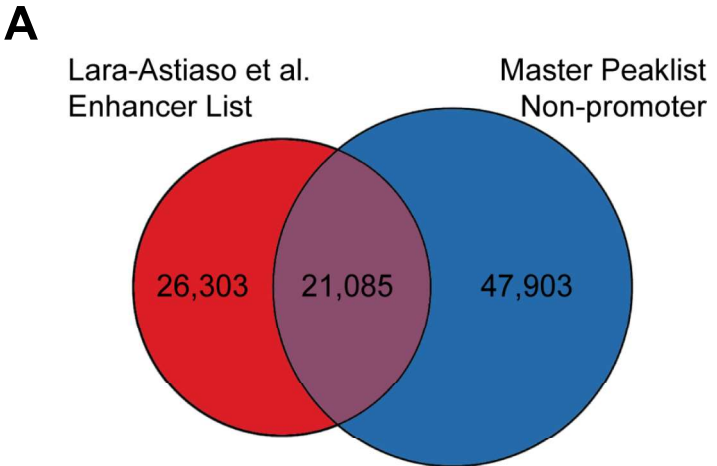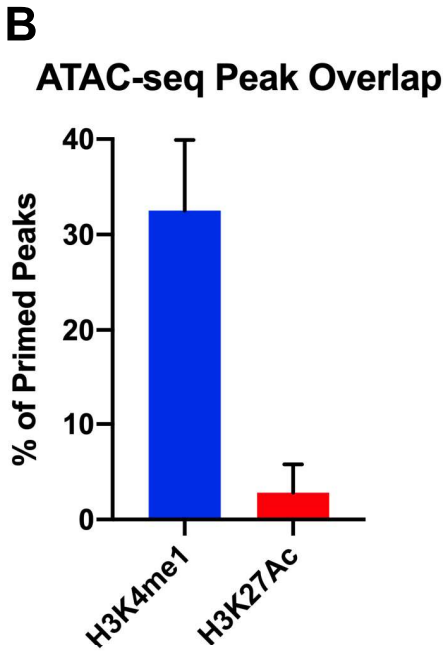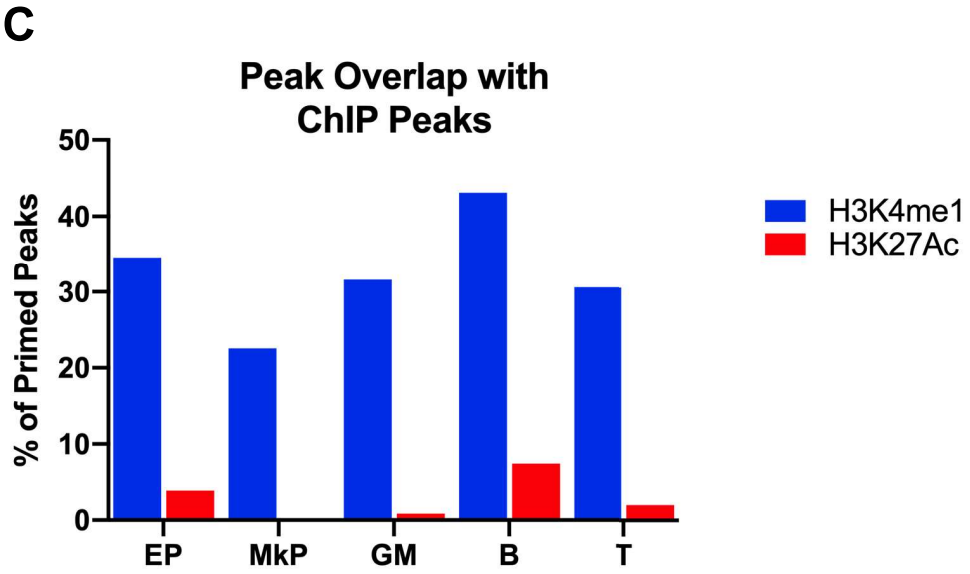

Supplement: 13072_2020_377_MOESM3_ESM.pdf [file 13072_2020_377_MOESM3_ESM.pdf]
